# Supplementary material for: Excited state deactivation mechanisms of protonated adenine: a theoretical study
Source: Royal Society of Chemistry journal article supplement (doi:10.1039/d2cp00106c), 2022-01-01
Supplement: d2cp00106c1.pdf [file d2cp00106c1.pdf]

## Electronic Supplementary File

### Excited State Deactivation Mechanisms of Protonated Adenine: a Theoretical Study

Leila Shahrokh, Reza Omidyan and Gholamhassan Azimi

*Department of Chemistry, University of Isfahan, 81746-73441, Isfahan, Iran*

---

#### Optimized Structures of lowest lying isomers ( $1^+$ , $2^+$ and $3^+$ ):

The optimized ground state geometry of the three most stable protonated isomers of adenine ( $1^+$ ,  $2^+$  and  $3^+$ ) has been determined at the MP2/aug-cc-pVDZ level of theory. The optimized structures possess the  $C_s$  symmetry point group and planar form. In fact, our results showed that three protonated isomers are very similar in bond lengths and only slight differences have been determined. The  $N_1-C_2$  bond length has been predicted to be 1.391 Å in the isomer  $1^+$ , while that has been predicted to be 1.325 and 1.318 Å respectively in  $2^+$  and  $3^+$  isomers. Also, the bond length of  $C_2=N_3$  in  $1^+$  (1.313 Å) is shorter than that of  $2^+$  (1.355 Å) and  $3^+$  (1.369 Å). The  $C_8-N_9$  bond in  $1^+$  and  $2^+$  is predicted to be longer (1.381, 1.392 Å) than that of the  $3^+$  (1.335 Å). The  $C_5-C_6$  bond length is similar in isomer  $2^+$  and  $3^+$  (1.422 Å), in the event that the  $C_5-C_6$  bond length has been predicted to be 1.413 Å in the isomer  $1^+$ . The  $C_6-N_{10}$  bond is the most elongated in isomer  $2^+$  (1.341 Å) and the shortest in isomer  $1^+$  (1.318 Å) among the three isomers. The  $C_5-N_7$  bond length has been predicted to lie within 1.373 Å to 1.380 Å for three most stable protonated isomers. The  $N_7-C_8$  bond length in  $1^+$  and  $3^+$  are quite similar (1.337, 1.329 Å), while it is elongated in isomer  $2^+$  (1.378 Å). The  $C_4-N_9$  bond lengths are between 1.361 Å and 1.369 Å. Our results showed that the bond length of  $N_3=C_4$  in  $1^+$  (1.359 Å) is shorter than that of  $2^+$  (1.368 Å) and  $3^+$  (1.367 Å). The  $C_4-C_5$  bond lengths are gained 1.412 Å, 1.409 Å and 1.404 Å in isomers  $1^+$ ,  $2^+$  and  $3^+$  respectively.

## Optimized Ground State Geometry of 9HA and 7HA

The optimized ground state geometry of the 9HA and 7HA has been determined at the MP2/aug-cc-pVDZ level of theory. Comparison the optimized geometries of neutral and protonated 9HA (1H-9H-A<sup>+</sup>, **1**<sup>+</sup>) exhibits that the C<sub>6</sub>-N<sub>10</sub> bond length decrease from 1.368 Å (in the 9HA) to 1.337 Å (in the **1**<sup>+</sup>). The N<sub>1</sub>=C<sub>6</sub> bond length has been predicted to be 1.347 Å in the 9HA, while The N<sub>1</sub>-C<sub>6</sub> bond in isomer **1**<sup>+</sup> is 1.369 Å. The N<sub>1</sub>-C<sub>2</sub> bond length in **1**<sup>+</sup> (1.391 Å) is longer thane one of the 9HA (1.360 Å). The C<sub>2</sub>=N<sub>3</sub> bond in 9HA (1.346 Å) is longer than the isomer **1**<sup>+</sup> (1.313 Å). The C<sub>6</sub>-N<sub>1</sub>-C<sub>2</sub> angle increases from 118.48 ° in 9HA to 124.18 ° in isomer **1**<sup>+</sup>. The N<sub>1</sub>-C<sub>2</sub>-N<sub>3</sub> angle decreases from 128.84 ° in 9HA to 124.40 ° in isomer **1**<sup>+</sup>.

Comparison the optimized ground state geometries of neutral and protonated 7HA (and 3H-7H-A<sup>+</sup> named as **2**<sup>+</sup>) exhibits that the C<sub>6</sub>-N<sub>10</sub> bond length decrease from 1.394 Å (in the 7HA) to 1.341 Å (in the **2**<sup>+</sup>). The N<sub>1</sub>=C<sub>6</sub> bond length has been predicted to be 1.338 Å in the 7HA, while The N<sub>1</sub>-C<sub>6</sub> bond in isomer **2**<sup>+</sup> is 1.364 Å. The N<sub>1</sub>-C<sub>2</sub> bond length in **2**<sup>+</sup> (1.325 Å) is shorter than that of the 7HA (1.367 Å). The C<sub>2</sub>=N<sub>3</sub> bond in 7HA (1.339 Å) is shorter than the isomer **2**<sup>+</sup> (1.355 Å). The N<sub>3</sub>-C<sub>4</sub> bond length in **2**<sup>+</sup> (1.368 Å) is elongated than in the 7HA (1.355 Å). The C<sub>2</sub>-N<sub>3</sub>-C<sub>4</sub> angle increases from 113.01 ° in 7HA to 118.32 ° in isomer **2**<sup>+</sup>. The N<sub>1</sub>-C<sub>2</sub>-N<sub>3</sub> angle decreases from 128.57 ° in 7HA to 124.43 ° in isomer **2**<sup>+</sup>.

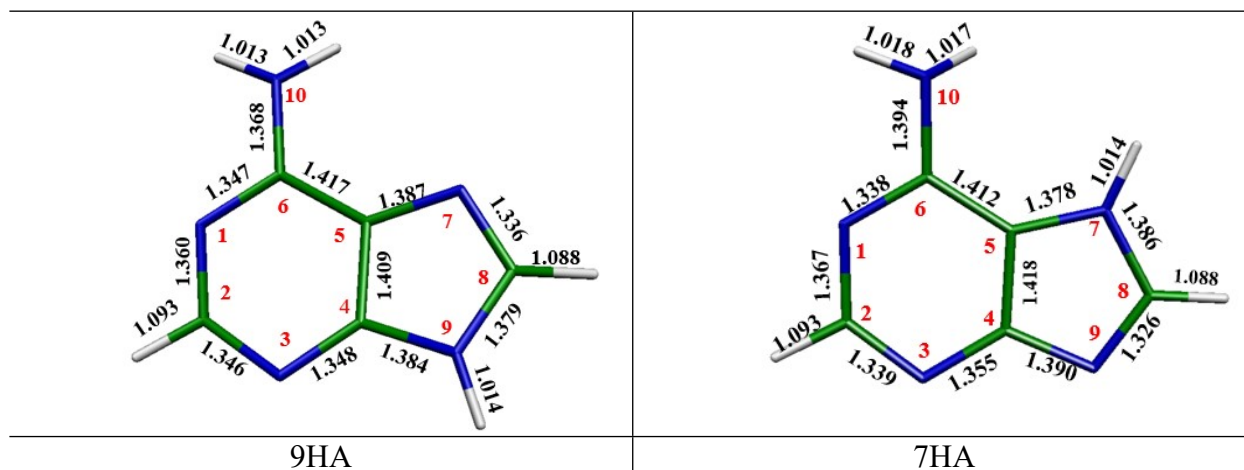

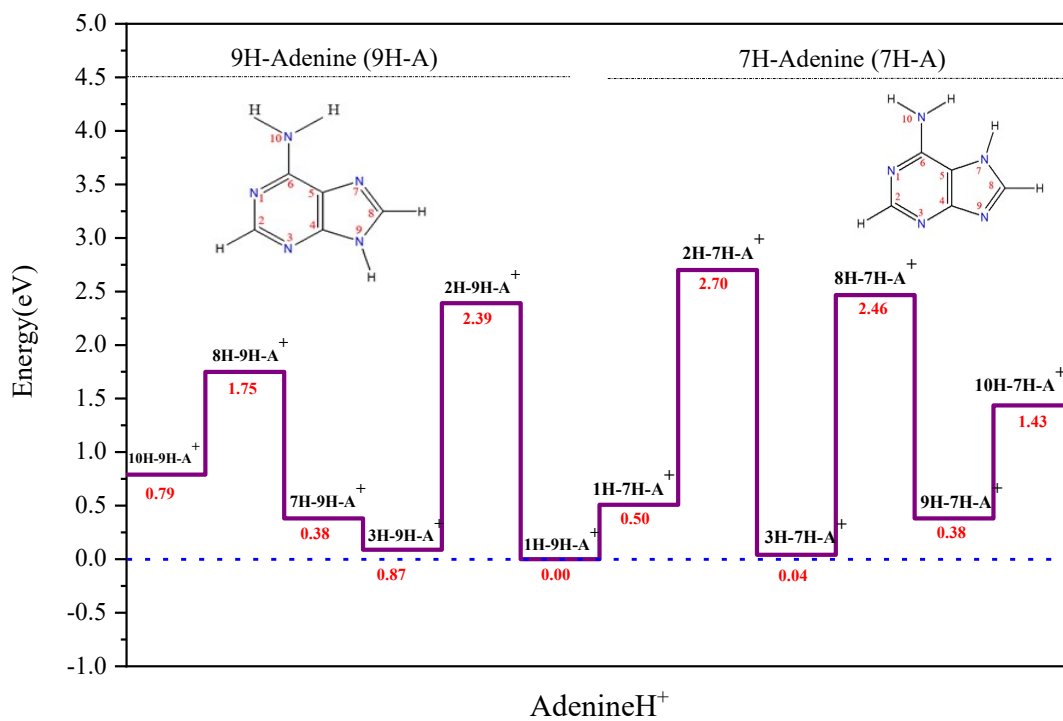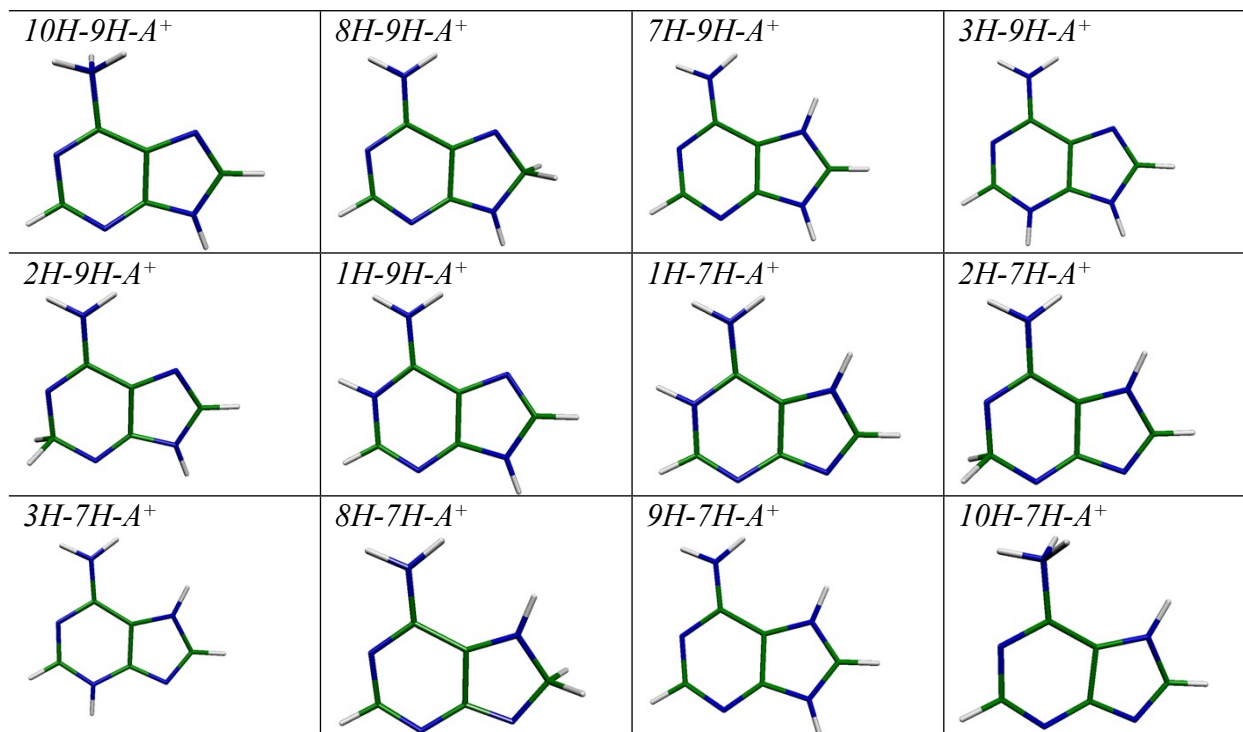

**Figure S1.** Relative stability (upper panel) and the optimized geometry (lower panel) for selected protonated isomers of Adenine determined at the MP2/aug-cc-pVDZ level.

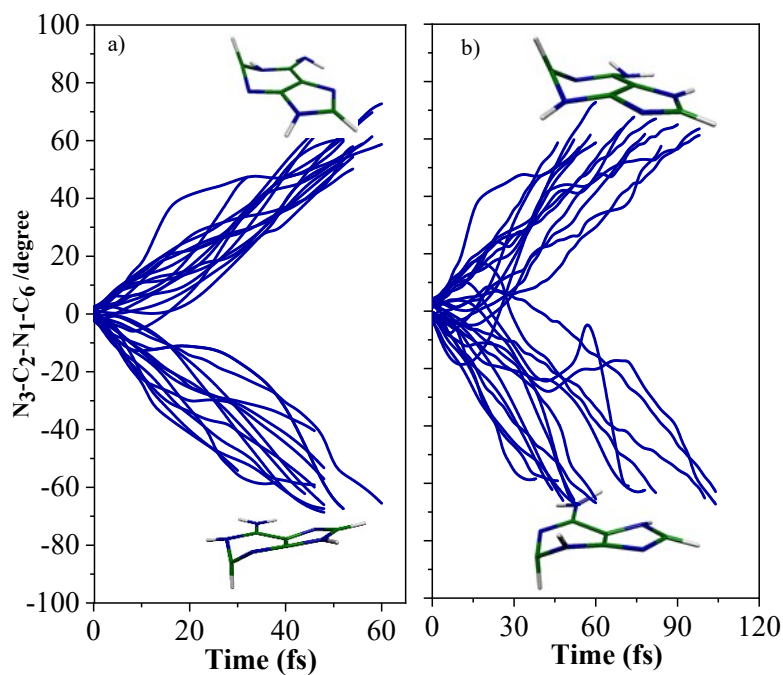

**Figure S2.** Time evolution of the dihedral angles of  $N_3-C_2-N_1-C_6$  for the  $1^+$  and  $2^+$ , (*a* and *b* respectively), for trajectories with relaxation pathway ending at  ${}^1\pi\pi^*/S_0$  intersection by out-of-plane distortion of  $C_2$ -pukering. Insets show the end points for a typical selected trajectory.

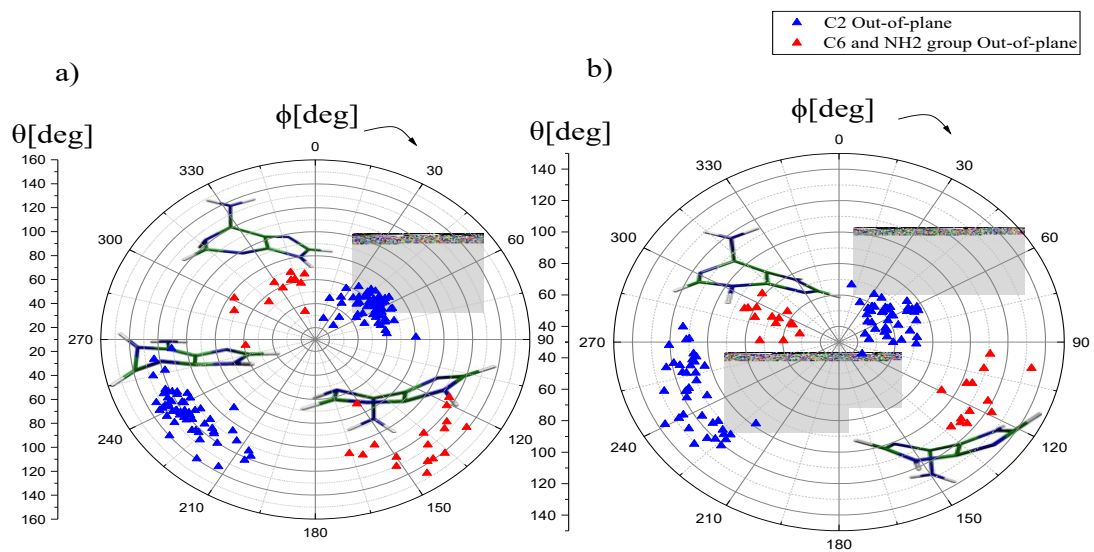

**Figure S3.** The distribution of Cremer – Pople parameters with polar plot ( $\theta$ ,  $\phi$ ) at  $\pi\pi^*/S_0$  crossing for  $1H-9H-A^+$  (a) and  $3H-7H-A^+$  (b).

**Table S1:** Schemes of valence molecular orbitals of 1H-9H-A<sup>+</sup> (1<sup>+</sup>) and 3H-7H-A<sup>+</sup> (2<sup>+</sup>) involved four occupied and four virtual orbitals in CASSCF (8,8) geometry optimization of conical intersections and six occupied and four virtual orbitals in the PEs curve at the CASPT2 (12, 10) level.

| <b>The most stable protonated isomers (1<sup>+</sup>)</b> |                           |                           |                              |                         |
|-----------------------------------------------------------|---------------------------|---------------------------|------------------------------|-------------------------|
| <i>HOMO</i> ( $\pi$ )                                     | <i>HOMO-1</i> ( $\pi$ )   | <i>HOMO-2</i> ( $n$ )     | <i>HOMO-3</i> ( $\pi$ )      | <i>HOMO-4</i> ( $n$ )   |
|                                                           |                           |                           |                              |                         |
| <i>LUMO</i> ( $\sigma^*$ )                                | <i>LUMO+1</i> ( $\pi^*$ ) | <i>LUMO+2</i> ( $\pi^*$ ) | <i>LUMO+3</i> ( $\sigma^*$ ) | <i>HOMO-5</i> ( $\pi$ ) |
|                                                           |                           |                           |                              |                         |

| <b>The second most stable protonated isomer (2<sup>+</sup>)</b> |                              |                              |                              |                         |
|-----------------------------------------------------------------|------------------------------|------------------------------|------------------------------|-------------------------|
| <i>HOMO</i> ( $\pi$ )                                           | <i>HOMO-1</i> ( $\pi$ )      | <i>HOMO-2</i> ( $\pi$ )      | <i>HOMO-3</i> ( $n$ )        | <i>HOMO-4</i> ( $n$ )   |
|                                                                 |                              |                              |                              |                         |
| <i>LUMO</i> ( $\pi^*$ )                                         | <i>LUMO+1</i> ( $\sigma^*$ ) | <i>LUMO+2</i> ( $\sigma^*$ ) | <i>LUMO+3</i> ( $\sigma^*$ ) | <i>HOMO-5</i> ( $\pi$ ) |
|                                                                 |                              |                              |                              |                         |

**Table S2:** The xyz coordinates of the ground state optimized geometry of the most stable isomer of AH<sup>+</sup>. The energetic values (in eV) represent the relative stabilities at the MP2/aug-cc-pVDZ level of theory.

**1H-9H-A<sup>+</sup> (0.0 eV)**

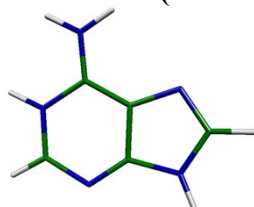


---

|   |          |          |          |
|---|----------|----------|----------|
| N | 3.61313  | -0.63913 | 0.25996  |
| N | 3.18660  | 1.70033  | 0.00634  |
| C | 4.01212  | 0.68743  | 0.13312  |
| C | 1.88228  | 1.31747  | 0.01152  |
| C | 1.37857  | 0.00462  | 0.13424  |
| C | 2.30820  | -1.05139 | 0.26820  |
| N | 0.00688  | -0.03172 | 0.10164  |
| N | 0.76263  | 2.09819  | -0.09912 |
| N | 1.96373  | -2.33725 | 0.39233  |
| C | -0.32918 | 1.25502  | -0.04066 |
| H | 5.09101  | 0.84937  | 0.14497  |
| H | -1.34941 | 1.62813  | -0.10638 |
| H | 0.74686  | 3.11095  | -0.20454 |
| H | 2.63746  | -3.08824 | 0.48786  |
| H | 0.97379  | -2.56767 | 0.39002  |
| H | 4.35434  | -1.33412 | 0.35151  |

---

**3H-7H-A<sup>+</sup> S<sub>0</sub> (0.04 eV)**

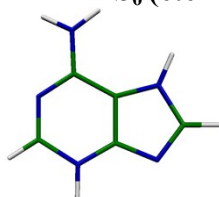


---

|   |          |          |          |
|---|----------|----------|----------|
| N | 3.63291  | -0.64835 | 0.29478  |
| N | 3.06189  | 1.64598  | 0.10899  |
| C | 3.95719  | 0.63473  | 0.22116  |
| C | 1.73093  | 1.33305  | 0.06787  |
| C | 1.33599  | -0.01777 | 0.14278  |
| C | 2.32475  | -1.03259 | 0.25981  |
| N | -0.03932 | 0.04121  | 0.07352  |
| N | 0.67678  | 2.18634  | -0.04123 |
| N | 2.08185  | -2.34895 | 0.33955  |
| C | -0.38117 | 1.37183  | -0.03492 |
| H | 5.01205  | 0.91327  | 0.25146  |
| H | -1.41811 | 1.69419  | -0.10647 |
| H | 2.87521  | -2.97828 | 0.42089  |
| H | 1.14915  | -2.74044 | 0.32341  |
| H | -0.70117 | -0.72968 | 0.09554  |
| H | 3.36507  | 2.61947  | 0.05584  |

---

**3H-9H-A<sup>+</sup> (0.08 eV)**

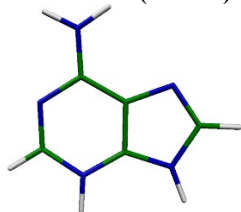

---

|   |          |          |          |
|---|----------|----------|----------|
| N | 1.79668  | -0.95985 | 0.13289  |
| N | 1.27623  | 1.35284  | -0.12696 |
| C | 2.14701  | 0.30426  | 0.00093  |
| C | -0.05728 | 1.05394  | -0.11559 |
| C | -0.50592 | -0.26888 | 0.02120  |
| C | 0.46696  | -1.29793 | 0.14859  |
| N | -1.88447 | -0.32435 | 0.00542  |
| N | -1.18229 | 1.82231  | -0.21698 |
| N | 0.14536  | -2.58195 | 0.28323  |
| C | -2.25825 | 0.94282  | -0.13832 |
| H | 3.20747  | 0.56423  | -0.01054 |
| H | -3.28500 | 1.29928  | -0.19334 |
| H | -1.24473 | 2.83139  | -0.32771 |
| H | 0.88175  | -3.27577 | 0.37043  |
| H | -0.82933 | -2.86668 | 0.29878  |
| H | 1.63674  | 2.30078  | -0.22439 |



The xyz coordinates of the CASSCF (8,8)/cc-pVDZ optimized geometry of the  $S_1/S_0$  conical intersections ( $CI_{1,3}$ ) resulting from out-of-plane deformation of 1H-9H-A<sup>+</sup>.

**1<sup>+</sup>**  
**C<sub>2</sub> out-of-plane: CI<sub>11</sub>**

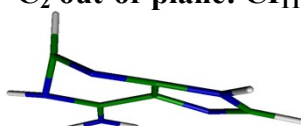


---

|   |          |          |          |
|---|----------|----------|----------|
| N | 3.67400  | -0.64300 | 0.40800  |
| N | 3.18700  | 1.58700  | 0.17500  |
| C | 3.89900  | 0.55100  | -0.31700 |
| C | 1.90900  | 1.36700  | -0.07400 |
| C | 1.47100  | 0.02700  | -0.17500 |
| C | 2.36900  | -1.01600 | 0.20400  |
| N | 0.09100  | -0.02400 | -0.15000 |
| N | 0.78500  | 2.10700  | -0.00500 |
| N | 1.97100  | -2.24700 | 0.36600  |
| C | -0.27900 | 1.21400  | -0.07500 |
| H | 4.15100  | 0.49200  | -1.37300 |
| H | -1.29900 | 1.55800  | -0.06400 |
| H | 0.72500  | 3.10200  | 0.07400  |
| H | 2.58100  | -2.97300 | 0.68400  |
| H | 0.99900  | -2.46100 | 0.23600  |
| H | 4.37500  | -1.36100 | 0.42100  |

---

**1<sup>+</sup>**  
**-C<sub>6</sub> out-of-plane: CI<sub>12</sub>**

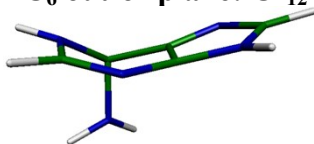


---

|   |          |          |          |
|---|----------|----------|----------|
| N | 1.90531  | -0.07319 | -0.35089 |
| N | 0.56385  | -0.32700 | 1.57420  |
| C | 1.72206  | -0.26664 | 0.97635  |
| C | -0.48184 | -0.24687 | 0.74436  |
| C | -0.42637 | 0.06713  | -0.66926 |
| C | 0.88962  | 0.65977  | -1.05454 |
| N | -1.56623 | -0.25273 | -1.26395 |
| N | -1.70349 | -0.73642 | 0.93070  |
| N | 0.79013  | 1.98542  | -0.67364 |
| C | -2.34495 | -0.71555 | -0.29508 |
| H | 2.60883  | -0.41762 | 1.57976  |
| H | -3.35841 | -1.05349 | -0.42180 |
| H | -2.04986 | -1.14016 | 1.78100  |
| H | 1.63430  | 2.46927  | -0.42965 |
| H | 0.17376  | 2.54107  | -1.23716 |
| H | 2.83155  | -0.13005 | -0.72652 |

---

**1<sup>+</sup>**  
**C<sub>8</sub> out-of-plane: CI<sub>13</sub>**

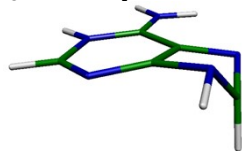


---

|   |          |          |          |
|---|----------|----------|----------|
| N | 3.54800  | -0.63300 | 0.19000  |
| N | 3.03200  | 1.68400  | -0.03300 |
| C | 3.89600  | 0.73000  | -0.01500 |
| C | 1.76100  | 1.30000  | 0.18200  |
| C | 1.29400  | -0.03600 | 0.19000  |
| C | 2.30600  | -1.08000 | 0.28900  |
| N | -0.04100 | -0.10200 | 0.04700  |
| N | 0.56400  | 2.12600  | 0.34500  |
| N | 1.97600  | -2.33100 | 0.45700  |
| C | -0.00800 | 1.20700  | -0.52300 |
| H | 4.95100  | 0.91000  | -0.13400 |
| H | -0.06900 | 1.33600  | -1.60100 |
| H | 0.68400  | 3.04200  | -0.05800 |
| H | 2.64700  | -3.06800 | 0.54900  |
| H | 1.00200  | -2.56600 | 0.50100  |
| H | 4.30800  | -1.28700 | 0.22800  |

The xyz coordinates of the CASSCF (8,8)/cc-pVDZ optimized geometry of the  $S_1/S_0$  conical intersections ( $CI_{1,3}$ ) resulting from out-of-plane deformation of 3H-7H-A<sup>+</sup>.

**2<sup>+</sup>**  
**C<sub>2</sub> out-of-plane: CI<sub>21</sub>**

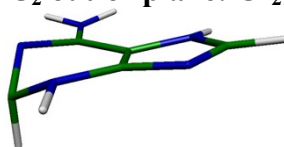


---

|   |          |          |          |
|---|----------|----------|----------|
| N | 3.57200  | -0.53700 | 0.61300  |
| N | 3.07700  | 1.70700  | 0.32100  |
| C | 3.96300  | 0.64900  | -0.06900 |
| C | 1.80200  | 1.35500  | 0.14100  |
| C | 1.42700  | -0.01900 | 0.00700  |
| C | 2.34800  | -1.03400 | 0.25000  |
| N | 0.03900  | 0.03200  | -0.05300 |
| N | 0.73000  | 2.15500  | 0.09900  |
| N | 2.12400  | -2.34500 | 0.31000  |
| C | -0.29100 | 1.33100  | -0.02500 |
| H | 4.13800  | 0.53400  | -1.13800 |
| H | -1.31500 | 1.66100  | -0.10300 |
| H | 2.86400  | -2.93900 | 0.62900  |
| H | 1.19800  | -2.71300 | 0.35900  |
| H | -0.59600 | -0.71500 | -0.24700 |
| H | 3.34300  | 2.66800  | 0.22300  |

---

**2<sup>+</sup>**  
**C<sub>6</sub> out-of-plane: CI<sub>22</sub>**

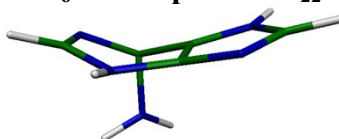


---

|   |          |          |          |
|---|----------|----------|----------|
| N | 3.51500  | -0.75300 | 0.57200  |
| N | 3.06800  | 1.43700  | -0.27100 |
| C | 3.87800  | 0.44500  | 0.34300  |
| C | 1.74200  | 1.22200  | -0.28800 |
| C | 1.25600  | -0.08000 | 0.03300  |
| C | 2.28700  | -1.17700 | -0.01700 |
| N | -0.04200 | 0.07000  | 0.22100  |
| N | 0.73400  | 2.12000  | -0.28800 |
| N | 2.37200  | -1.37900 | -1.38700 |
| C | -0.32900 | 1.41900  | -0.00100 |
| H | 4.84500  | 0.79800  | 0.67500  |
| H | -1.33000 | 1.80700  | 0.08700  |
| H | 3.28900  | -1.50100 | -1.77900 |
| H | 1.69500  | -2.01000 | -1.77400 |
| H | -0.69400 | -0.63300 | 0.51200  |
| H | 3.39500  | 2.38500  | -0.27800 |

---

**2<sup>+</sup>**  
**C<sub>8</sub> out-of-plane:Cl<sub>23</sub>**

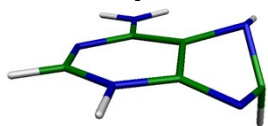

---

|   |          |          |          |
|---|----------|----------|----------|
| N | 3.55500  | -0.61000 | 0.17900  |
| N | 3.06100  | 1.70300  | 0.21200  |
| C | 3.89500  | 0.64500  | 0.23400  |
| C | 1.72000  | 1.45000  | 0.08500  |
| C | 1.28300  | 0.07100  | 0.28500  |
| C | 2.24100  | -0.96500 | 0.16700  |
| N | -0.11300 | 0.17100  | 0.56800  |
| N | 0.73100  | 2.18900  | -0.26800 |
| N | 1.97500  | -2.25100 | 0.13800  |
| C | -0.17000 | 1.09000  | -0.52800 |
| H | 4.94900  | 0.87700  | 0.29100  |
| H | -0.29900 | 0.77600  | -1.56100 |
| H | 2.74000  | -2.89800 | 0.13000  |
| H | 1.04500  | -2.61200 | 0.15500  |
| H | -0.64000 | -0.67200 | 0.40500  |
| H | 3.42000  | 2.63900  | 0.15000  |

The xyz coordinates of the first excited state (S1) optimized geometry of  $1^+$  and  $2^+$  at the ADC(2)/aug-cc-pVDZ level of theory and in the Cs symmetry point group.

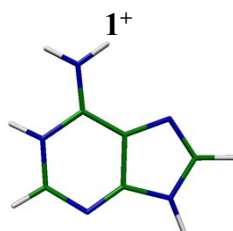


---

|   |          |          |         |
|---|----------|----------|---------|
| N | 1.79286  | 0.56053  | 0.00000 |
| N | -0.23170 | 2.01432  | 0.00000 |
| C | 1.17203  | 1.82014  | 0.00000 |
| C | -0.90025 | 0.91526  | 0.00000 |
| C | -0.35516 | -0.47748 | 0.00000 |
| C | 1.02611  | -0.62618 | 0.00000 |
| N | -1.35944 | -1.41010 | 0.00000 |
| N | -2.28880 | 0.69086  | 0.00000 |
| N | 1.67498  | -1.80313 | 0.00000 |
| C | -2.48691 | -0.66600 | 0.00000 |
| H | 1.82491  | 2.69256  | 0.00000 |
| H | -3.48736 | -1.09933 | 0.00000 |
| H | -3.01001 | 1.40897  | 0.00000 |
| H | 2.69033  | -1.86972 | 0.00000 |
| H | 1.12888  | -2.66490 | 0.00000 |
| H | 2.80952  | 0.51419  | 0.00000 |

---

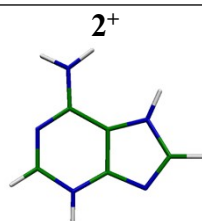


---

|   |          |          |         |
|---|----------|----------|---------|
| N | 1.95223  | 0.58264  | 0.00000 |
| N | -0.05477 | 2.00040  | 0.00000 |
| C | 1.39599  | 1.80698  | 0.00000 |
| C | -0.85086 | 0.91289  | 0.00000 |
| C | -0.27132 | -0.39926 | 0.00000 |
| C | 1.21208  | -0.51683 | 0.00000 |
| N | -1.33892 | -1.22982 | 0.00000 |
| N | -2.22011 | 0.86667  | 0.00000 |
| N | 1.82256  | -1.73724 | 0.00000 |
| C | -2.50978 | -0.43011 | 0.00000 |
| H | 2.00469  | 2.70922  | 0.00000 |
| H | -3.50273 | -0.87539 | 0.00000 |
| H | 2.84291  | -1.76291 | 0.00000 |
| H | 1.31235  | -2.61492 | 0.00000 |
| H | -1.33699 | -2.24927 | 0.00000 |
| H | -0.45733 | 2.93695  | 0.00000 |

---

**Table S3.** Vertical transition energies, oscillator strength,  $S_1$ - $S_0$  adiabatic and the  $S_2$ - $S_0$  adiabatic transition energy for 9HA and 7HA, determined at the ADC (2)/aug-cc-pVDZ level of theory.

| 9H-A                                                                   |                      |                      | 7H-A                                                                   |                      |                      |
|------------------------------------------------------------------------|----------------------|----------------------|------------------------------------------------------------------------|----------------------|----------------------|
| Excited state                                                          | Transition energy/eV | Oscillator strengths | Excited state                                                          | Transition energy/eV | Oscillator strengths |
| $S_1(n\pi^*_1)$                                                        | 4.98                 | 0.014                | $S_1(n\pi^*_1)$                                                        | 4.75                 | 0.014                |
| S <sub>1</sub> -S <sub>0</sub> adiabatic transition energy <b>4.30</b> |                      |                      | S <sub>1</sub> -S <sub>0</sub> adiabatic transition energy <b>4.09</b> |                      |                      |
| $S_2(\pi\pi^*_1)$                                                      | 5.09                 | 0.255                | $S_2(\pi\pi^*_1)$                                                      | 4.87                 | 0.117                |
| $S_3(\pi\pi^*_2)$                                                      | 5.11                 | 0.030                | $S_3(\pi\pi^*_2)$                                                      | 5.08                 | 0.010                |
| $S_4(\pi\pi^*_3)$                                                      | 5.39                 | 0.010                | $S_4(n\pi^*_2)$                                                        | 5.38                 | 0.001                |
| $S_5(n\pi^*_2)$                                                        | 5.62                 | 0.002                | $S_5(\pi\pi^*_3)$                                                      | 5.50                 | 0.054                |
